# Supplementary material
Source: publisher site journal article supplement (https://biorisk.pensoft.net/article/77465/download/suppl/35/)
Supplement: Supplementary file 1

Mean root length (mm) of seedlings grew on WA+NaCl and WA + PEG 6000.
